# Supplementary material for: CNS-11g reduces α-synuclein pathology and restores motor function in a Parkinson’s model
Source: Research Square preprint supplement (doi:10.21203/rs.3.rs-7935366/v1), 2025-11-13

**Supplementary File**:

Full Uncropped Blots used for Figure 3

Figure 3A. Brainstem pSyn in TBS Fraction (>250 kDa; monomer-normalized) – Blot #1


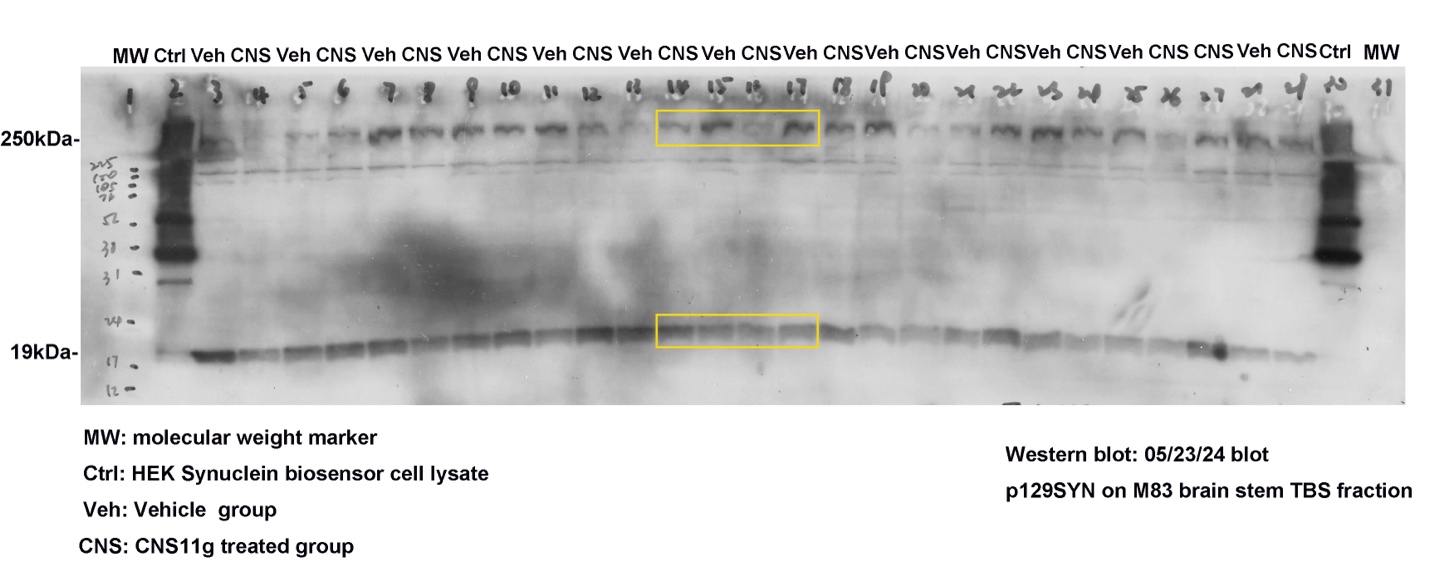


Figure 3B. Brainstem GAPDH in TBS Fraction (for normalization of >250 kDa aSyn) – Blot #1


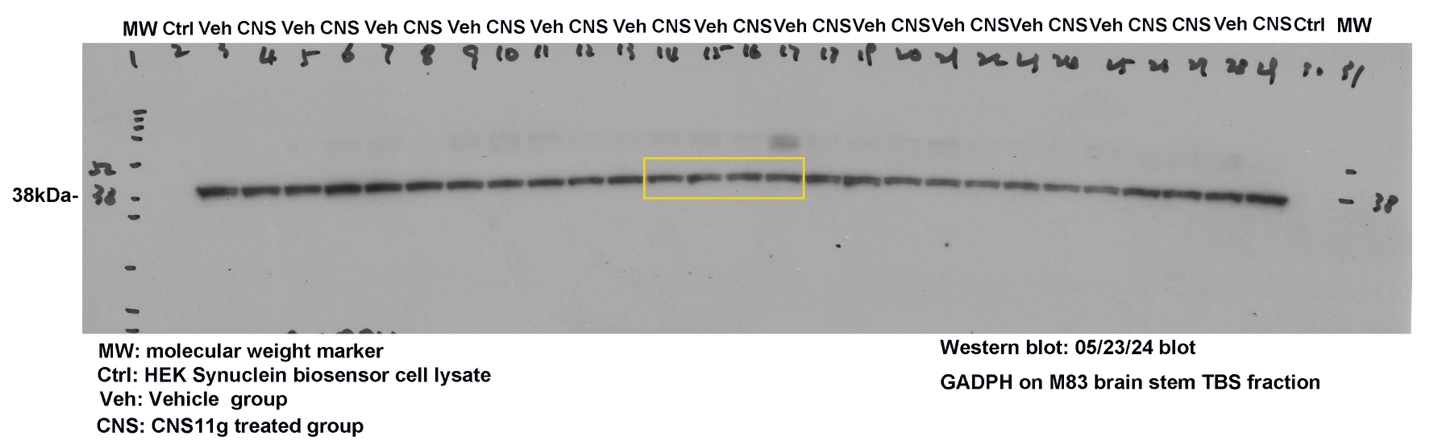


Figure 3B. Spinal Cord pSyn (>250 kDa aSyn; monomer-normalized) – Blot #2


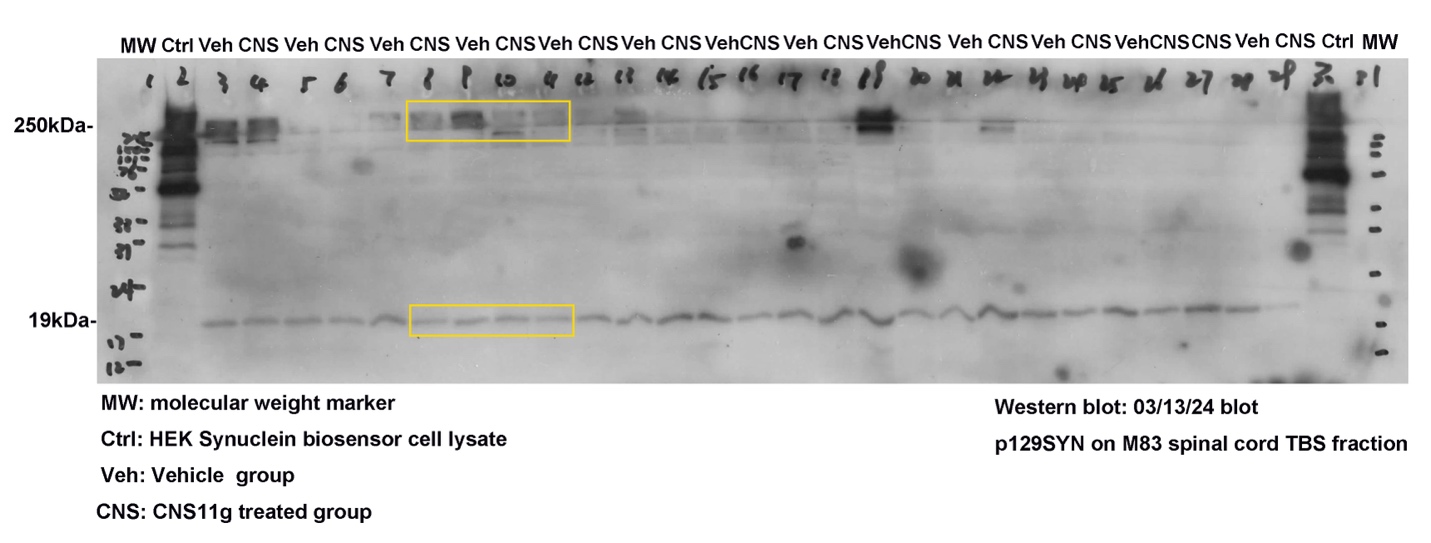


Figure 3B. Spinal Cord GAPDH in TBS Fraction (for normalization of >250 kDa aSyn) – Blot #2


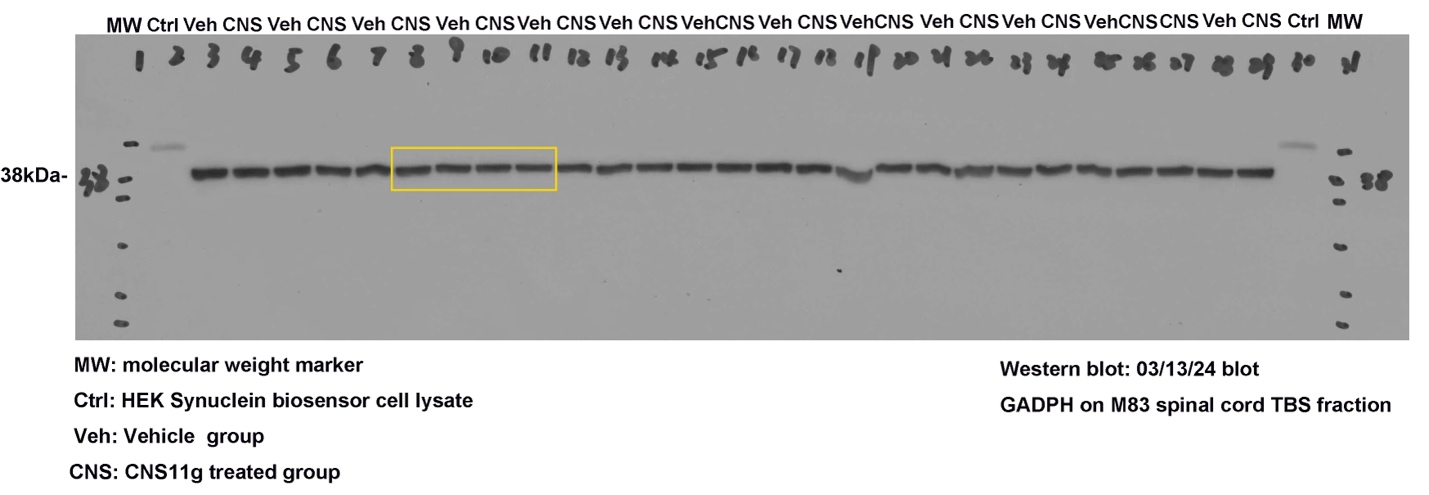


Figure 3C. Brainstem SNAP25 in Lysis Fraction – Blot #3


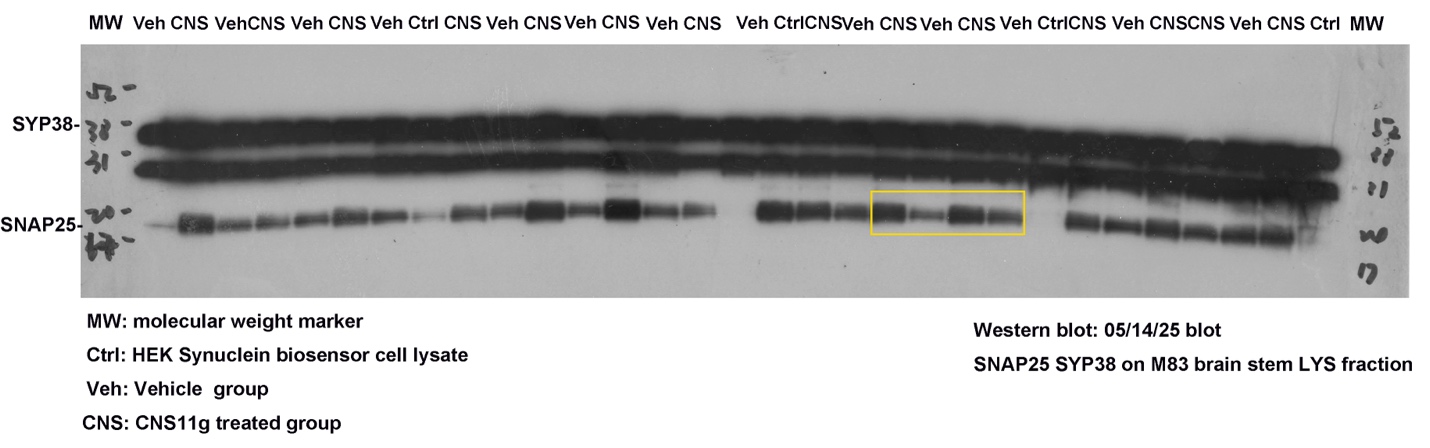


Figure 3C. Brainstem Tubulin in Lysis Fraction – Blot #3


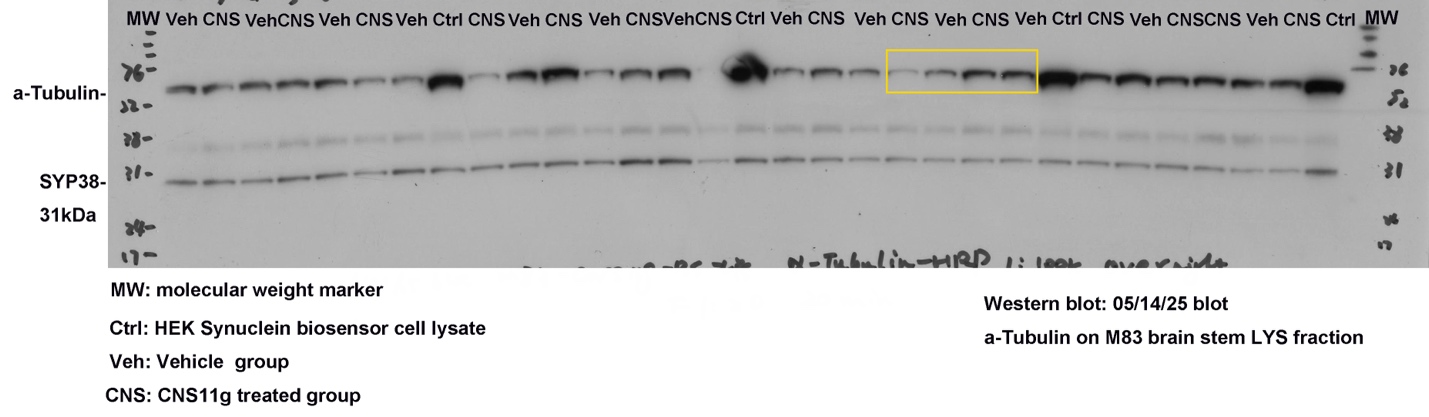


Figure 3C. Brainstem SY38 in Lysis Fraction – Blot #3


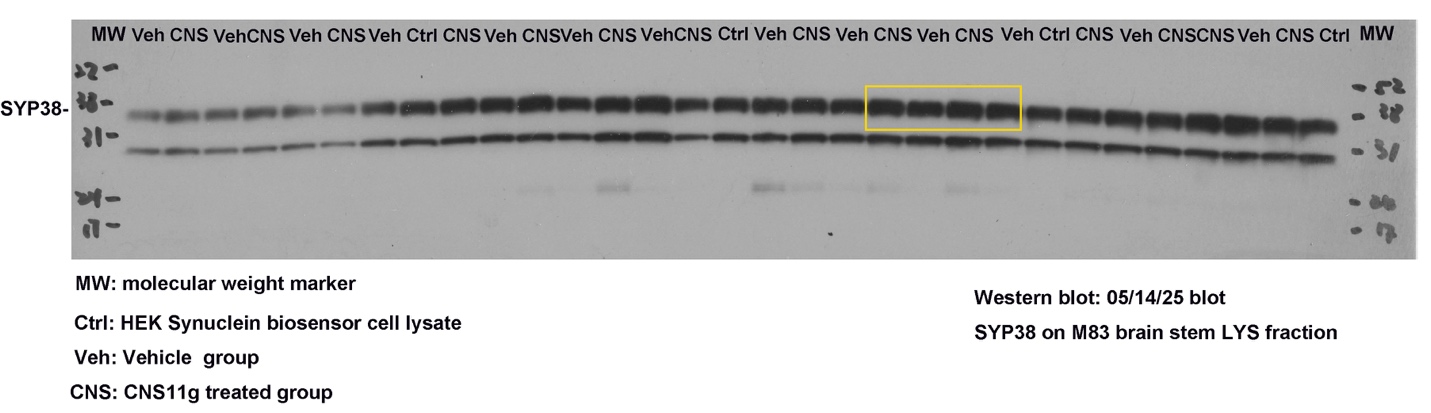


Detergent Insoluble aSyn (not shown in the body of the manuscript)


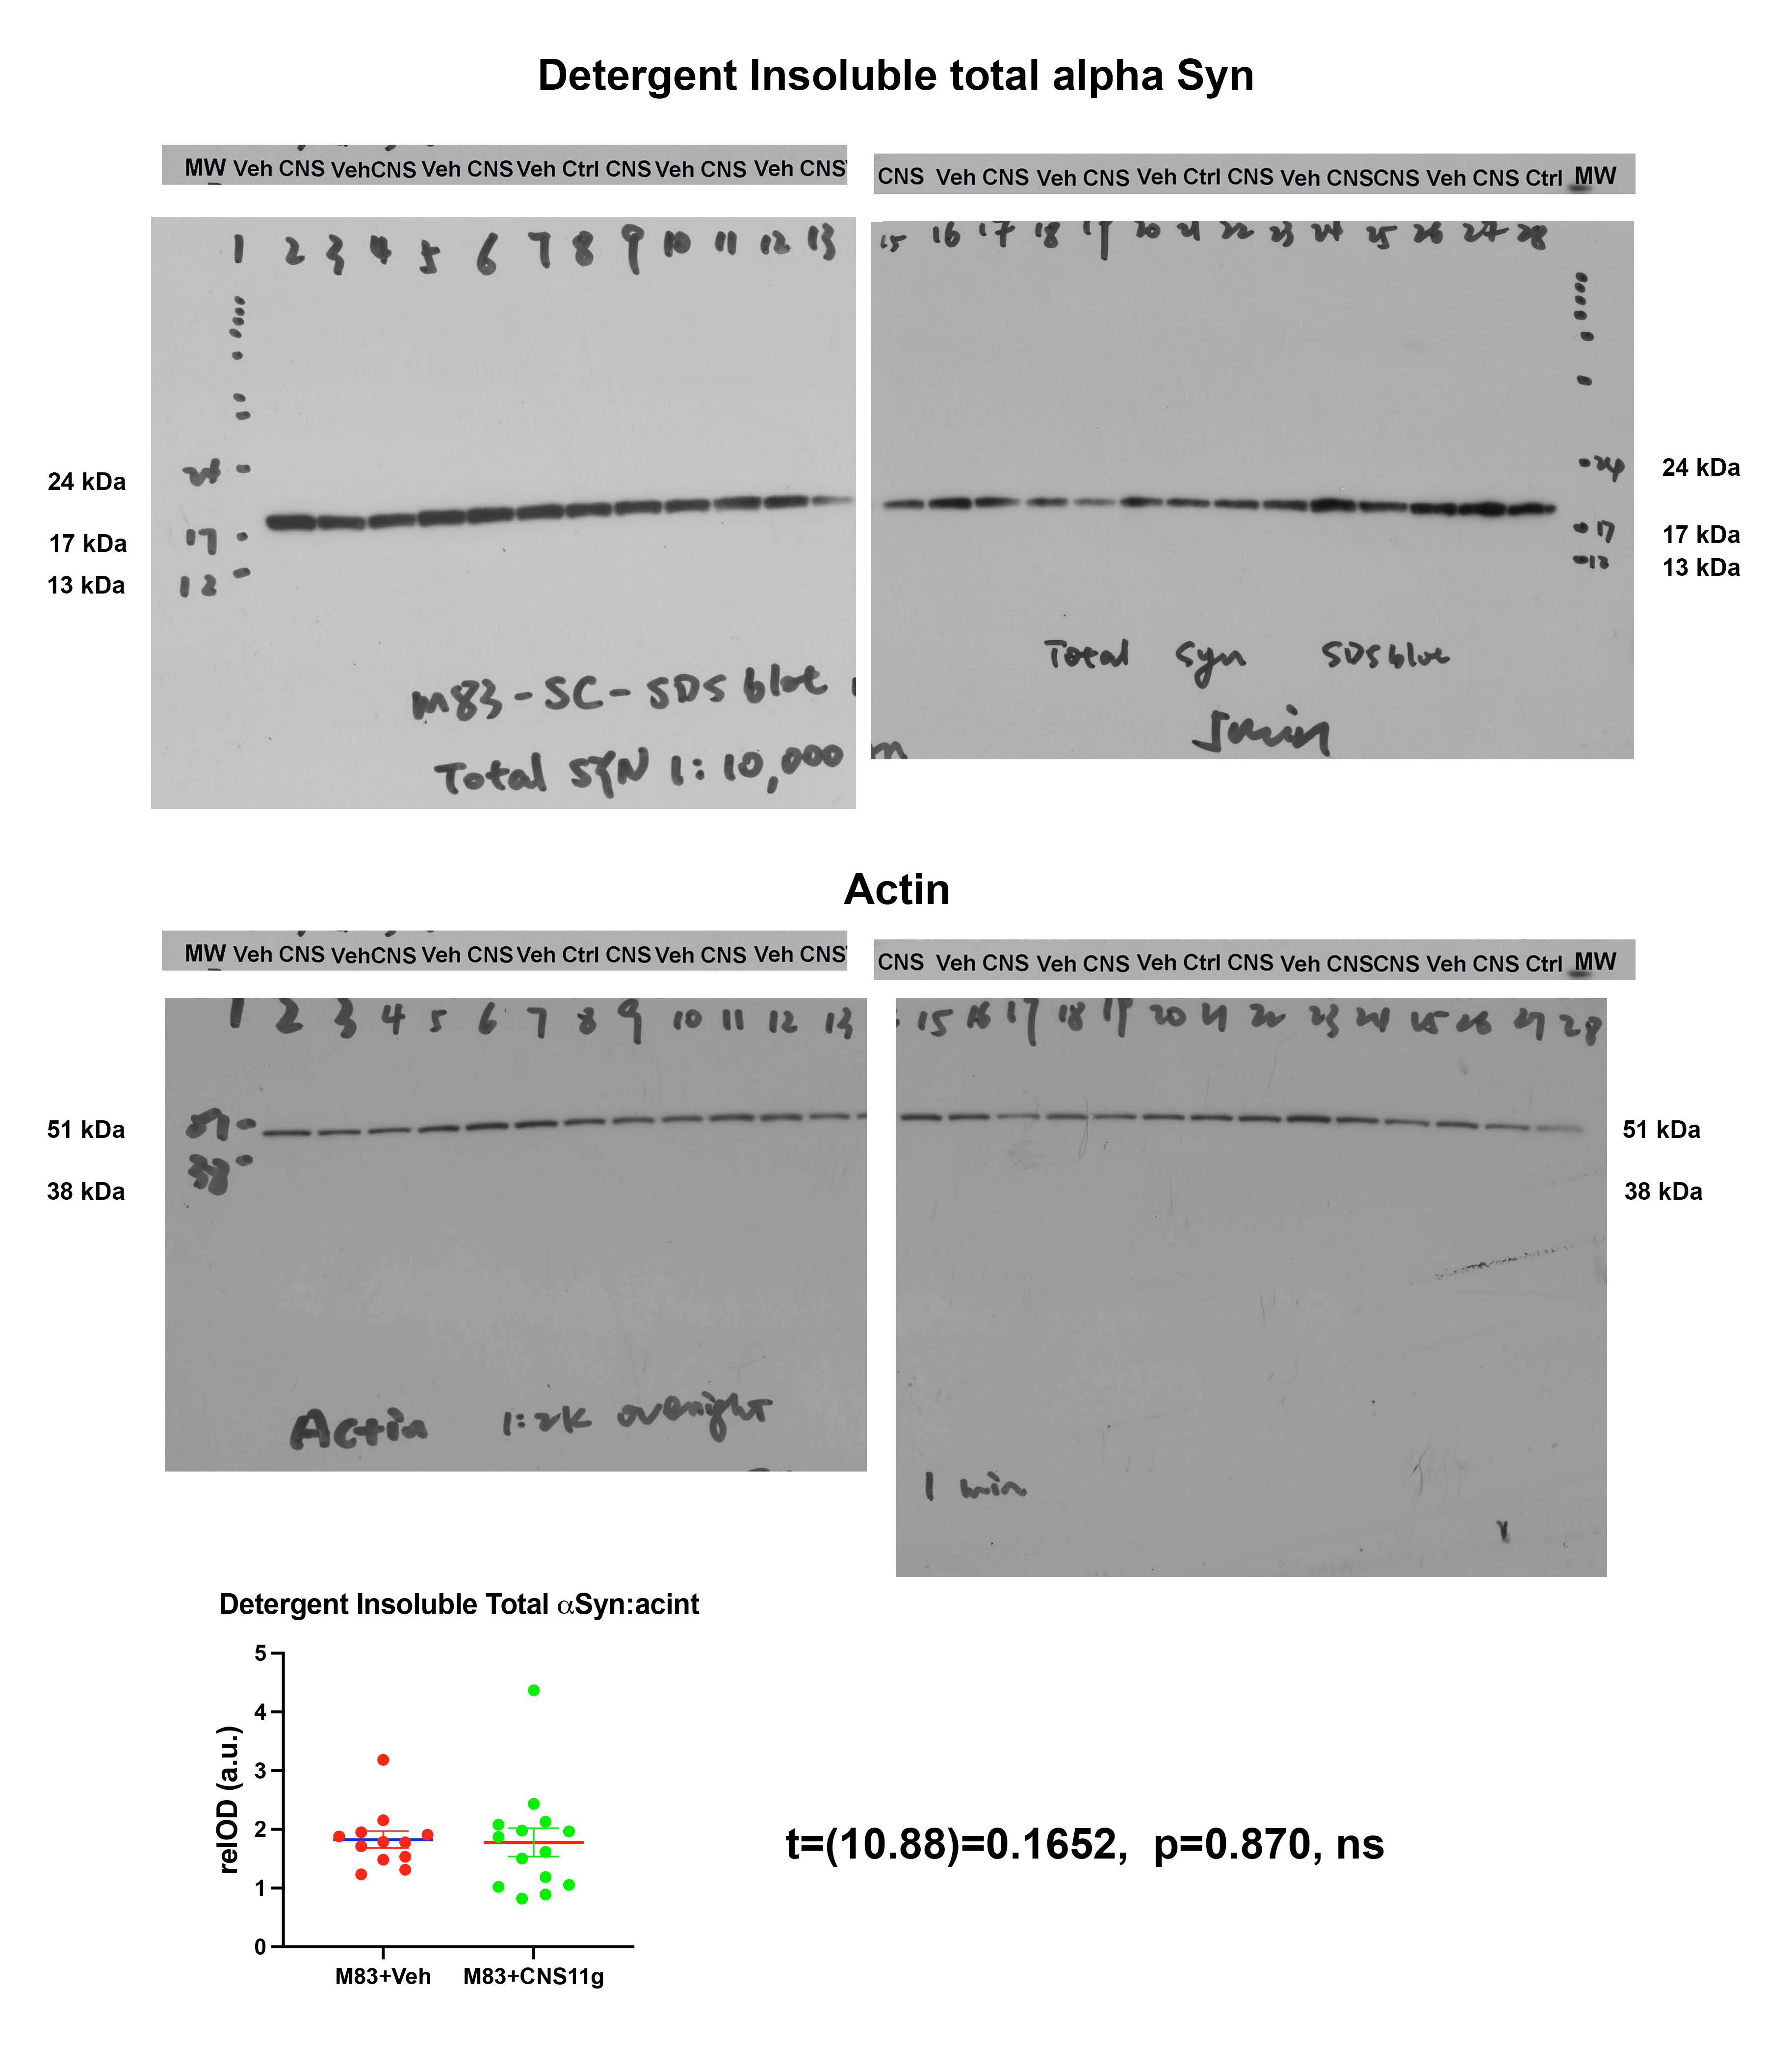

Supplement: Supplementary file 1 [file dd720327559bd0f2a4c72430.docx]
